# Supplementary material for: Key biomarkers and latent pathways of dysferlinopathy: Bioinformatics analysis and in vivo validation
Source: Frontiers journal article supplement (doi:10.3389/fneur.2022.998251), 2022-09-20
Supplement: Data_Sheet_1.PDF [file Data_Sheet_1.PDF]

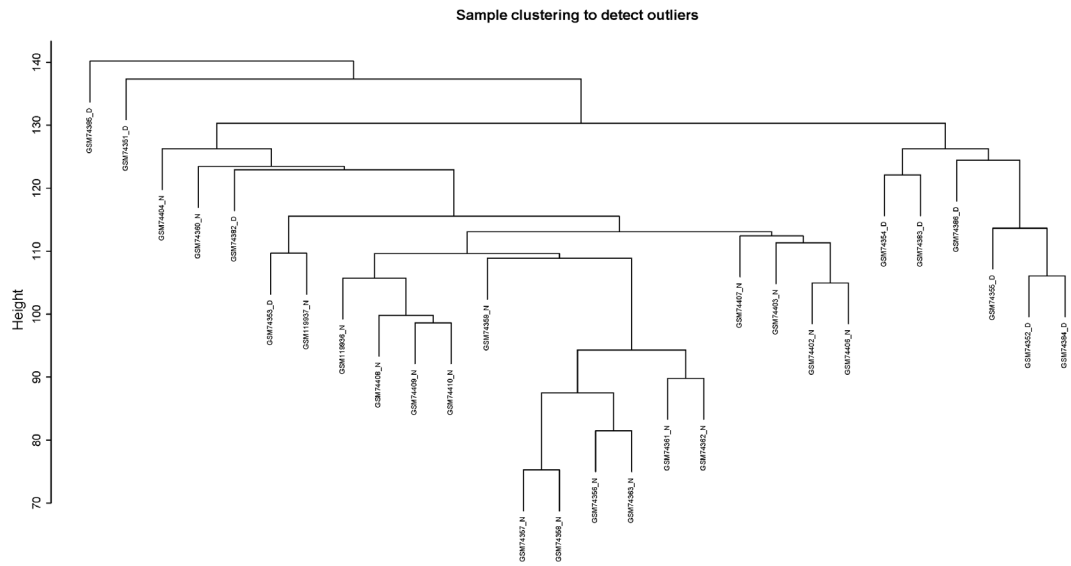

**Supplementary Figure 1.** Clustering dendrogram of samples. The abscissa represents the sample name while the ordinate represents the clustering height.
